# Supplementary material
Source: publisher figshare collection journal article supplement (https://frontiersin.figshare.com/ndownloader/files/35355838)
Supplement: Supplementary file [file 35355838]

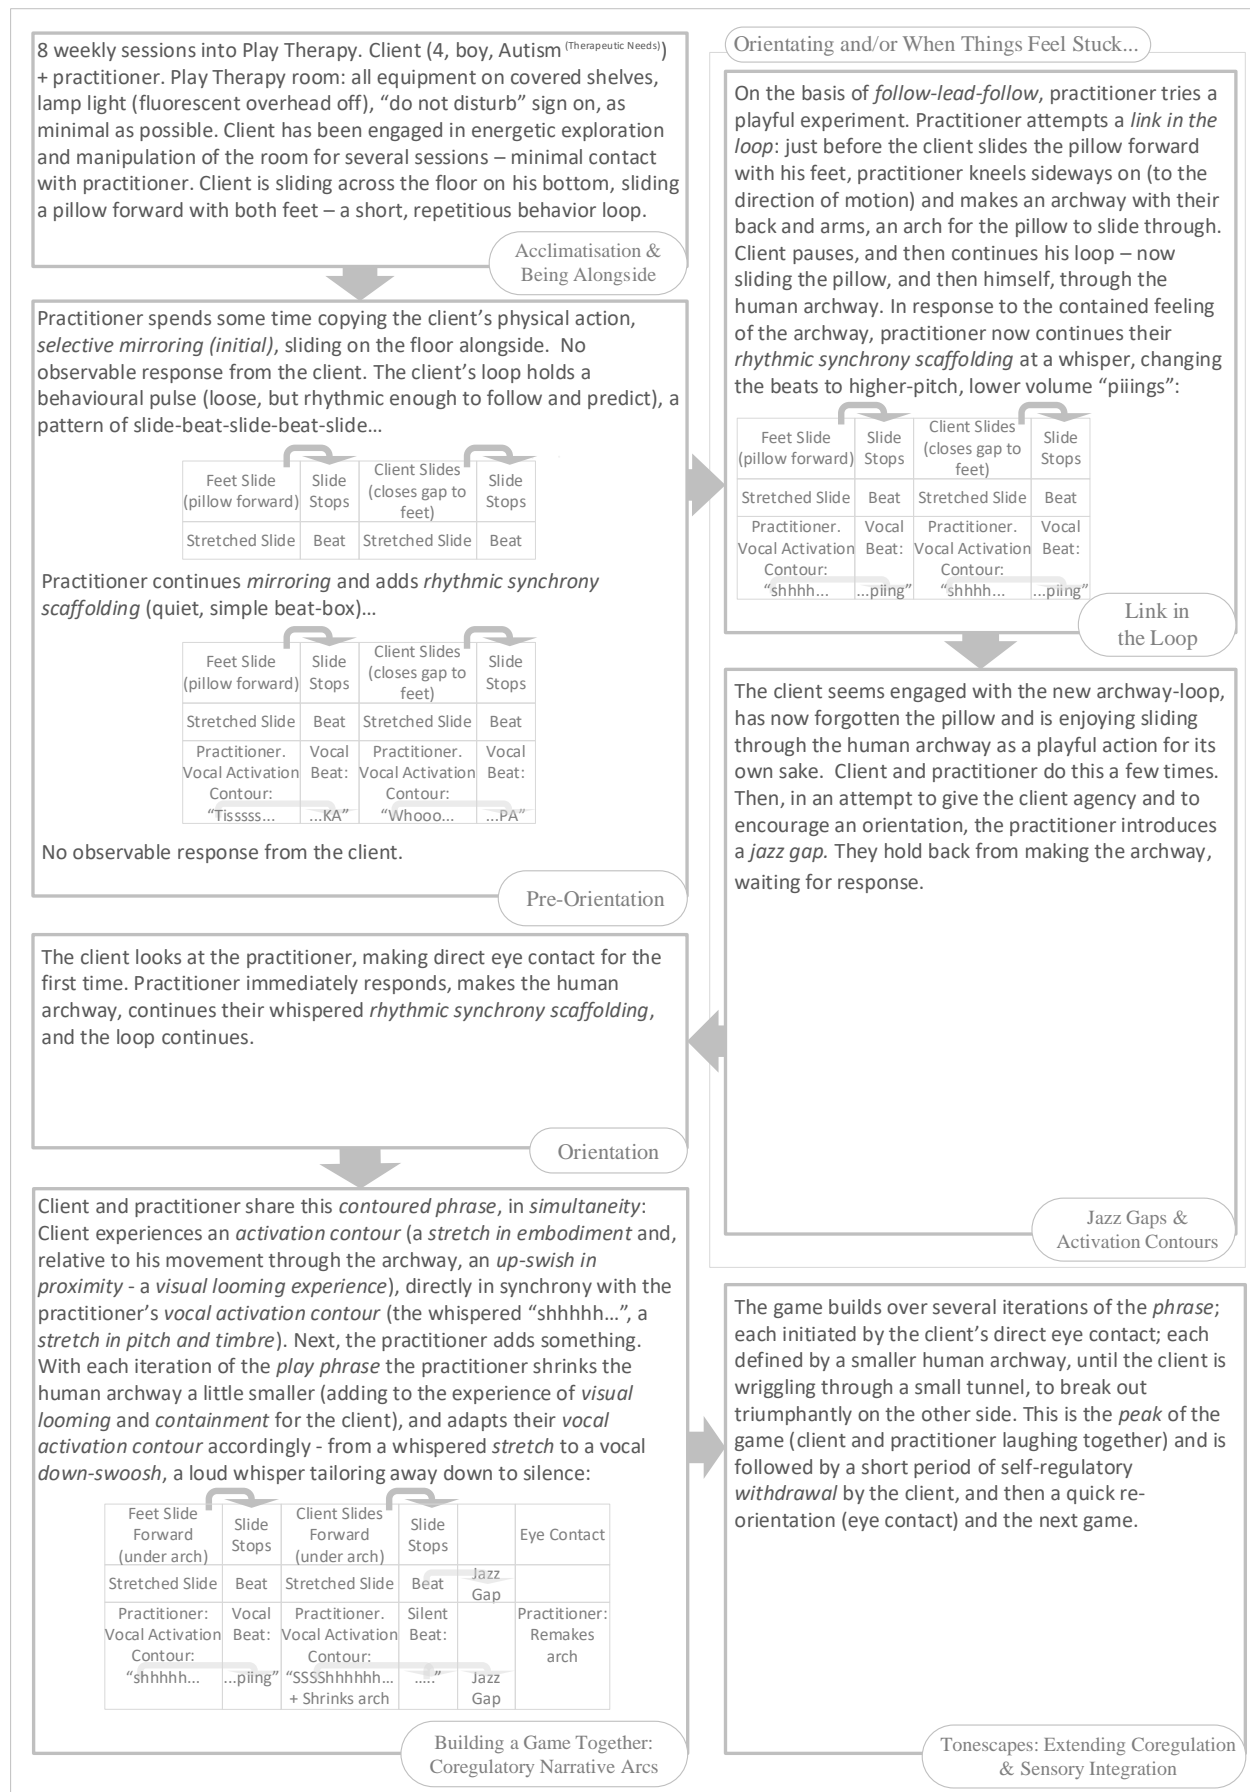

Supplementary Figure 1. Case Example. Rhythmic Relating within Play Therapy: Stuart Daniel.

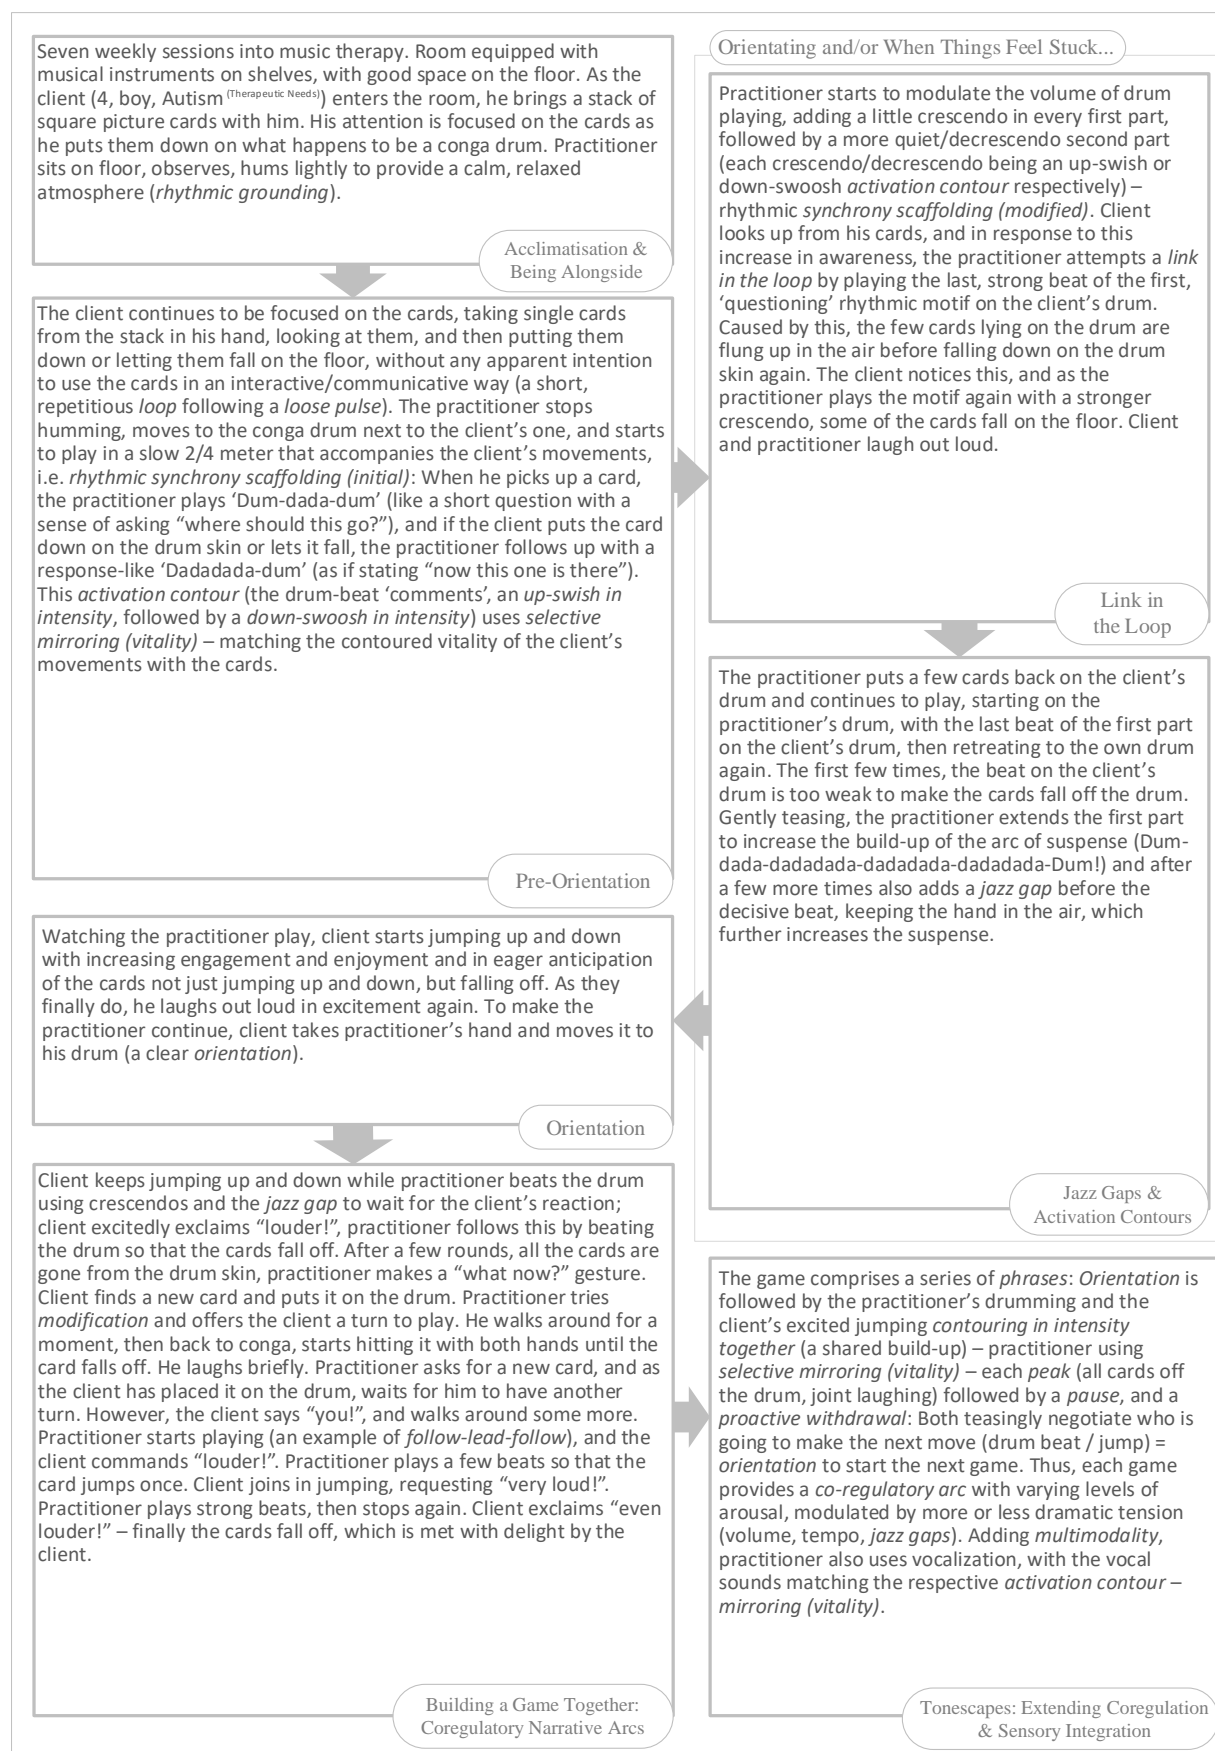

Supplementary Figure 2. Case Example. Rhythmic Relating within Improvisational Music Therapy: Monika Geretsegger & Ulla Holck.

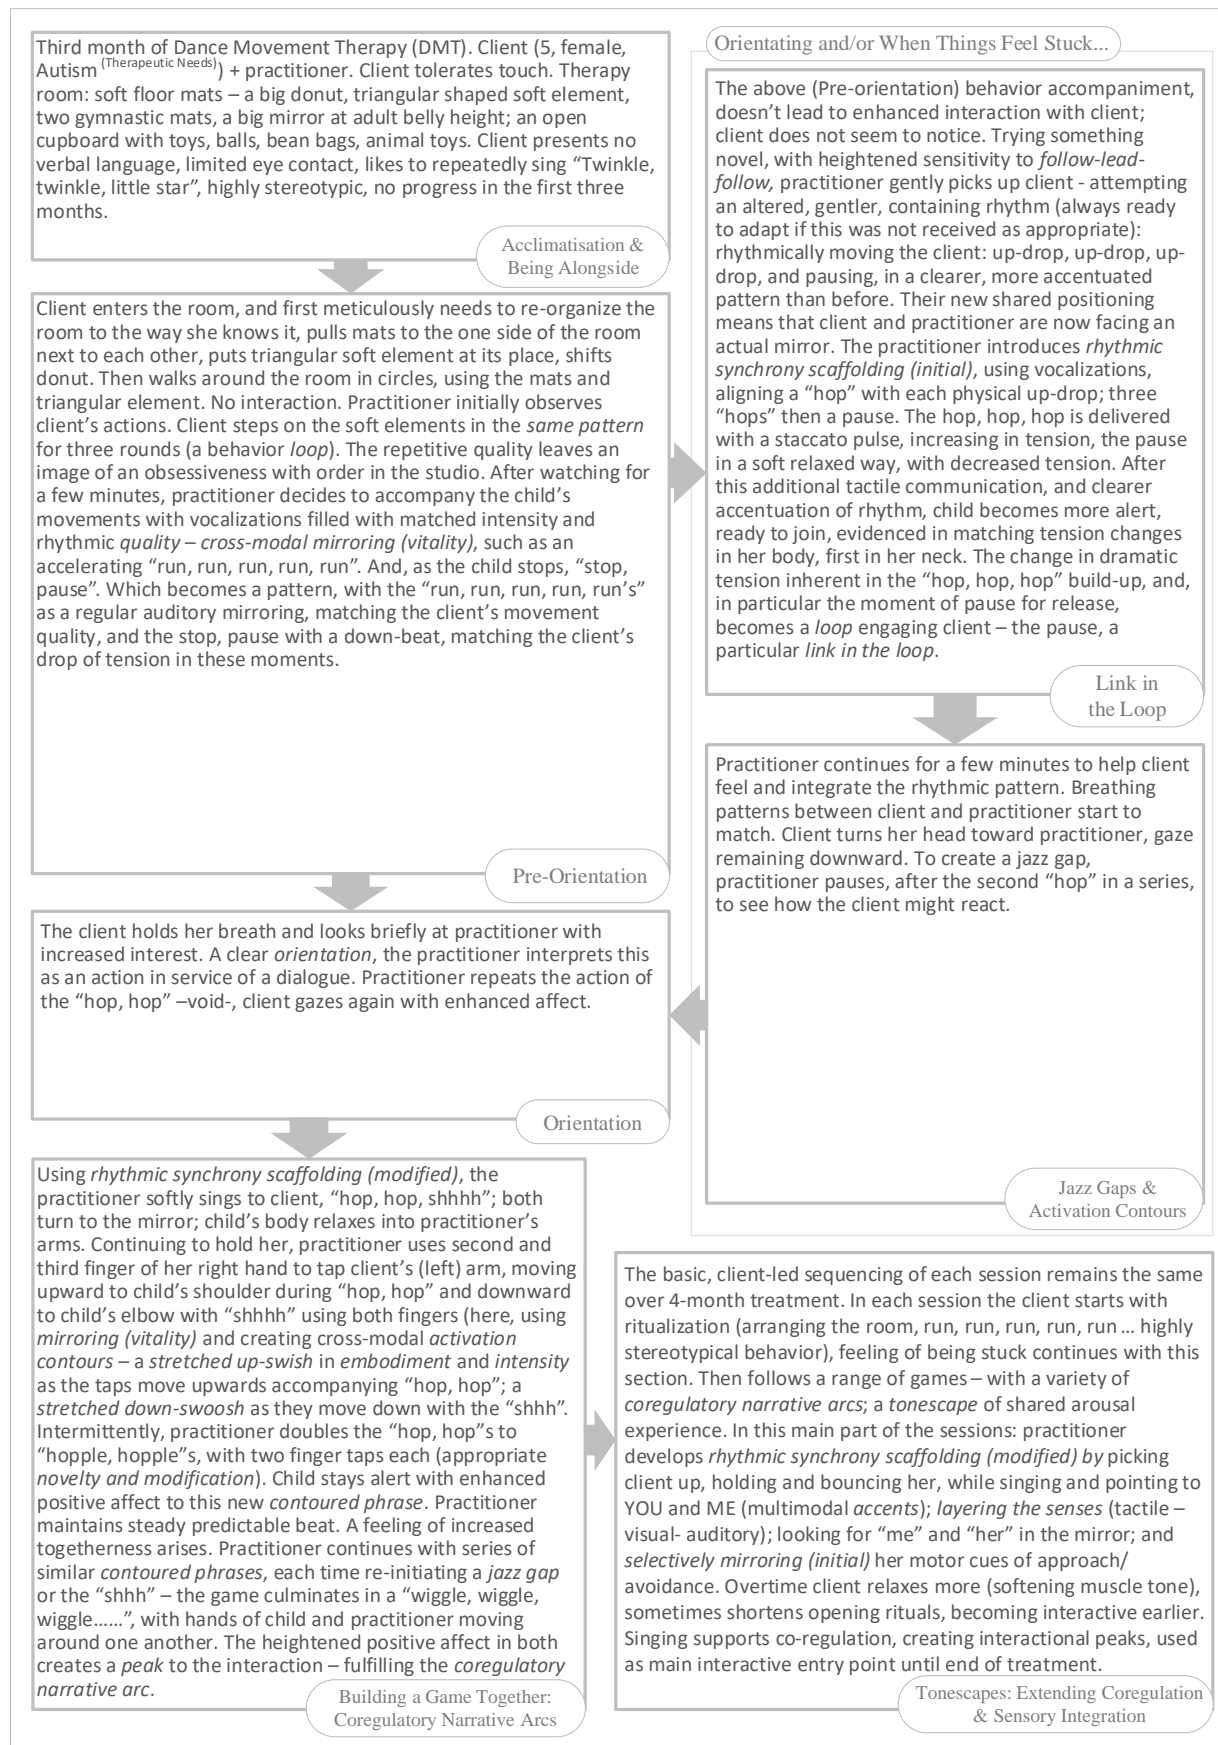

Supplementary Figure 3. Case Example. Rhythmic Relating within Dance Movement Therapy: Sabine Koch.

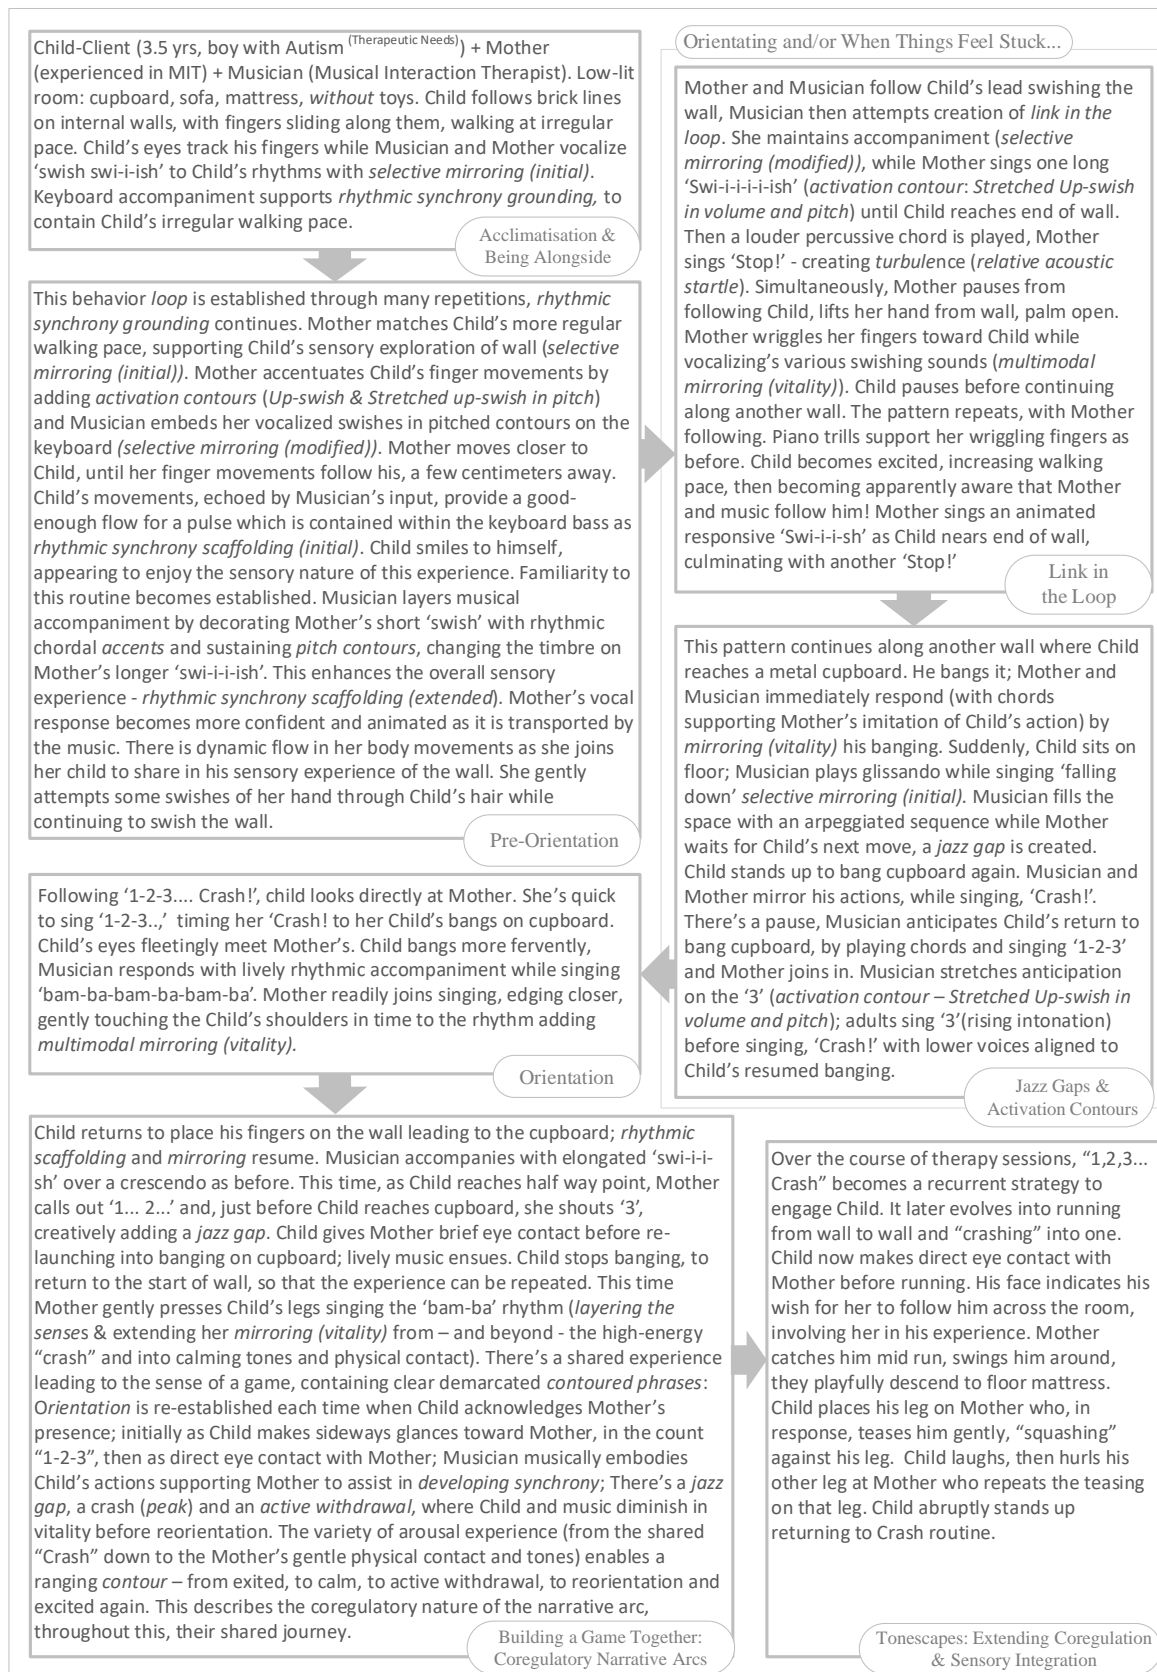

Supplementary Figure 4. Case Example. Rhythmic Relating within Musical Interaction Therapy (MIT): Judit Elias-Masiques, Marie-Claire Howorth, & Dawn Wimporoy.

MIT involves triadic working: Musician and familiar adult (e.g., parent) support the interactions of a child-client with their familiar adult (the person best placed to facilitate enhanced communication from that child - within and beyond therapy). Musician's role resembles live pianist's accompaniment in early cinemas.

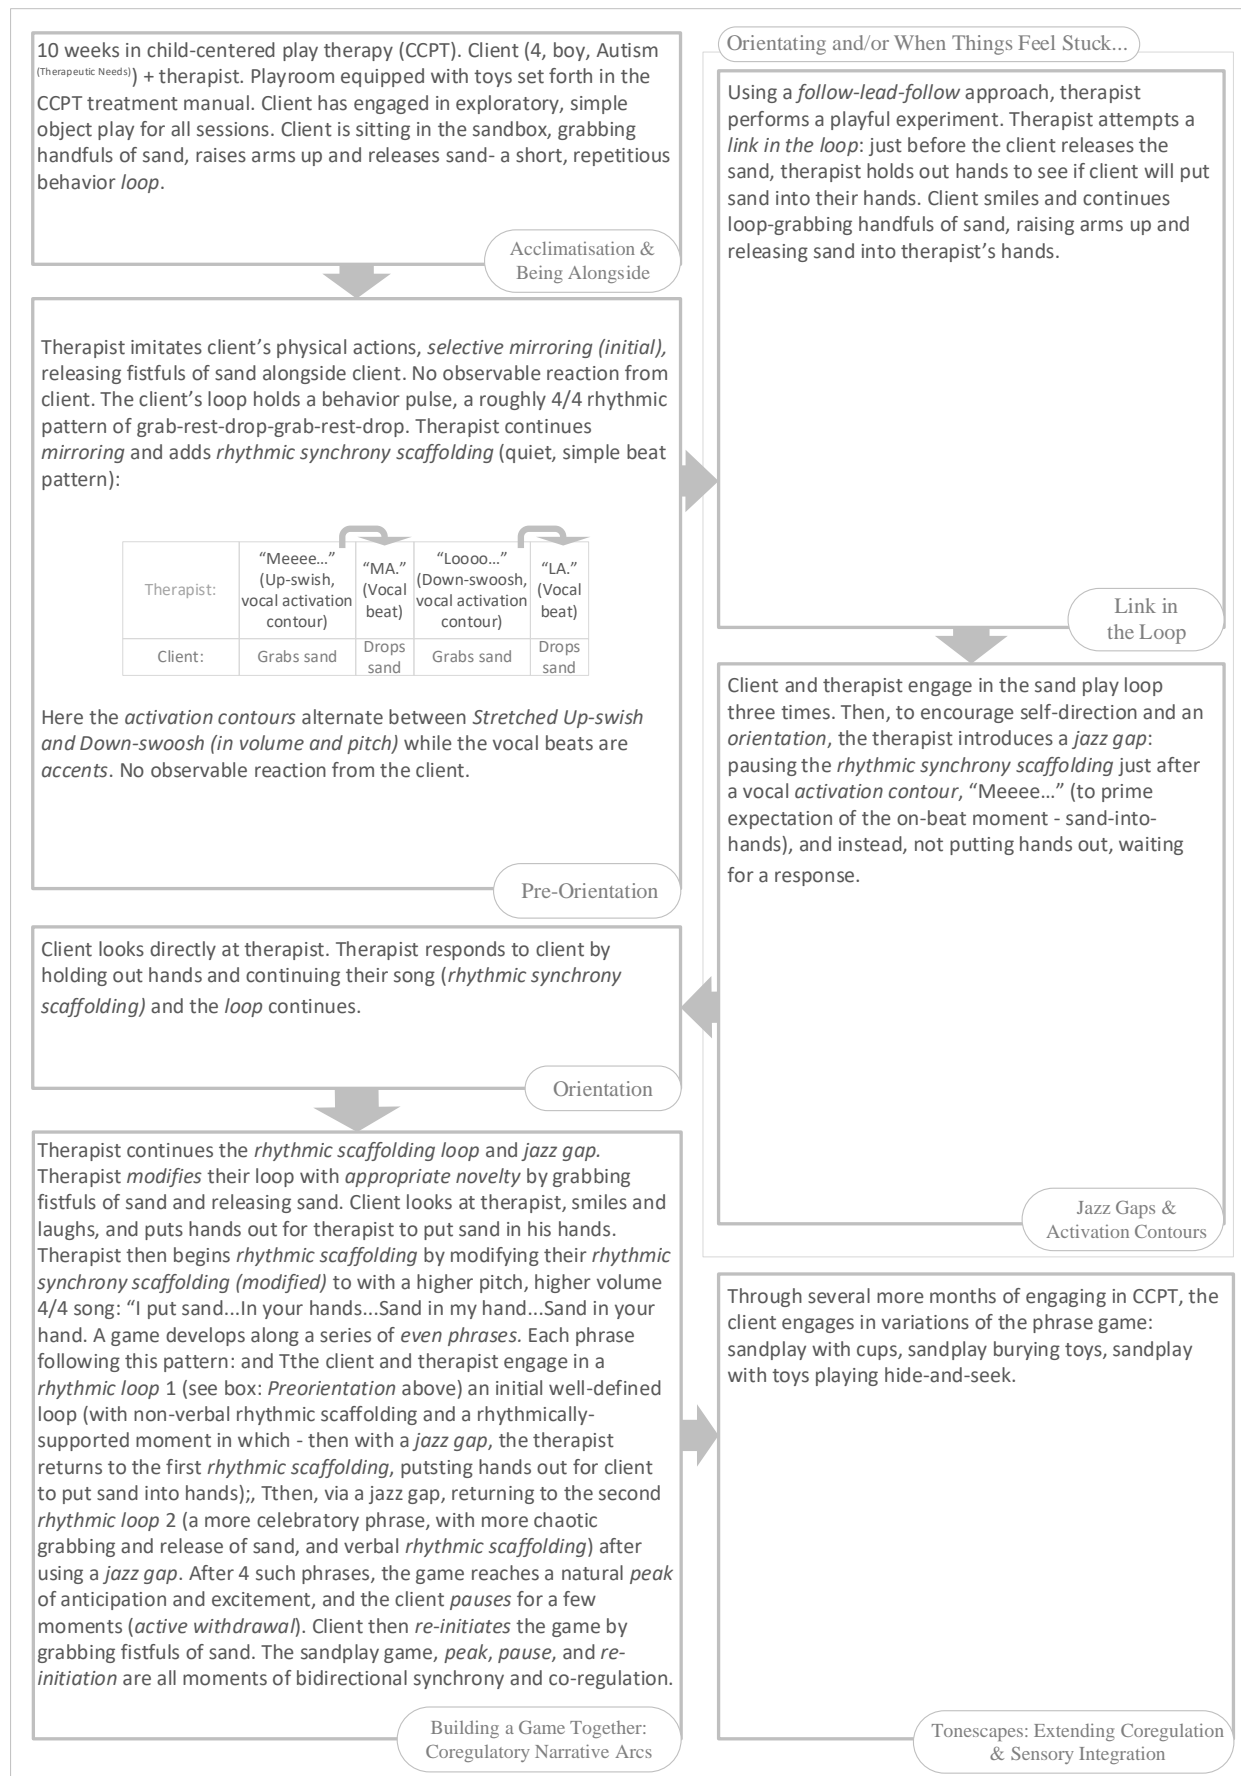

Supplementary Figure 5. Case Example. Rhythmic Relating within Play Therapy: Karrie Swan.



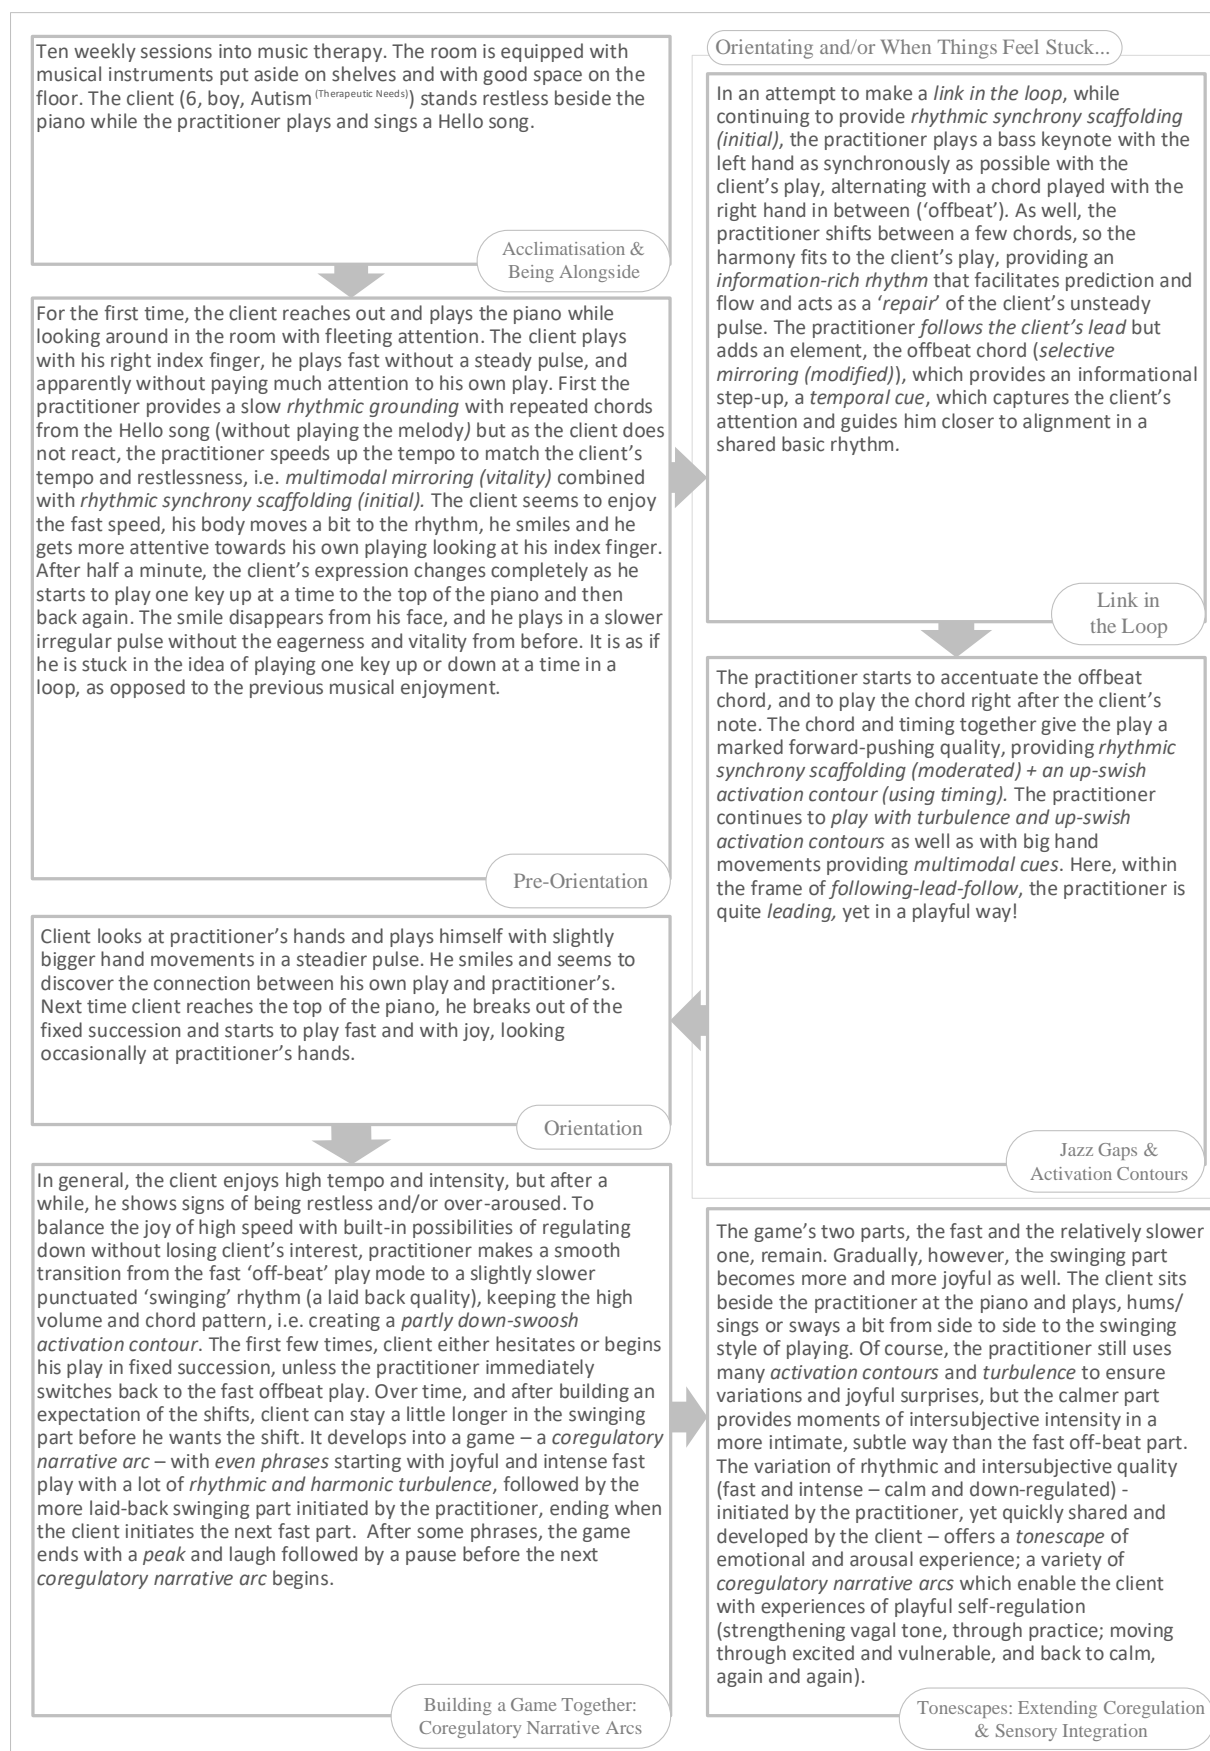

Supplementary Figure 6. Case Example. Rhythmic Relating within Improvisational Music Therapy: Ulla Holck & Monika Geretsegger.

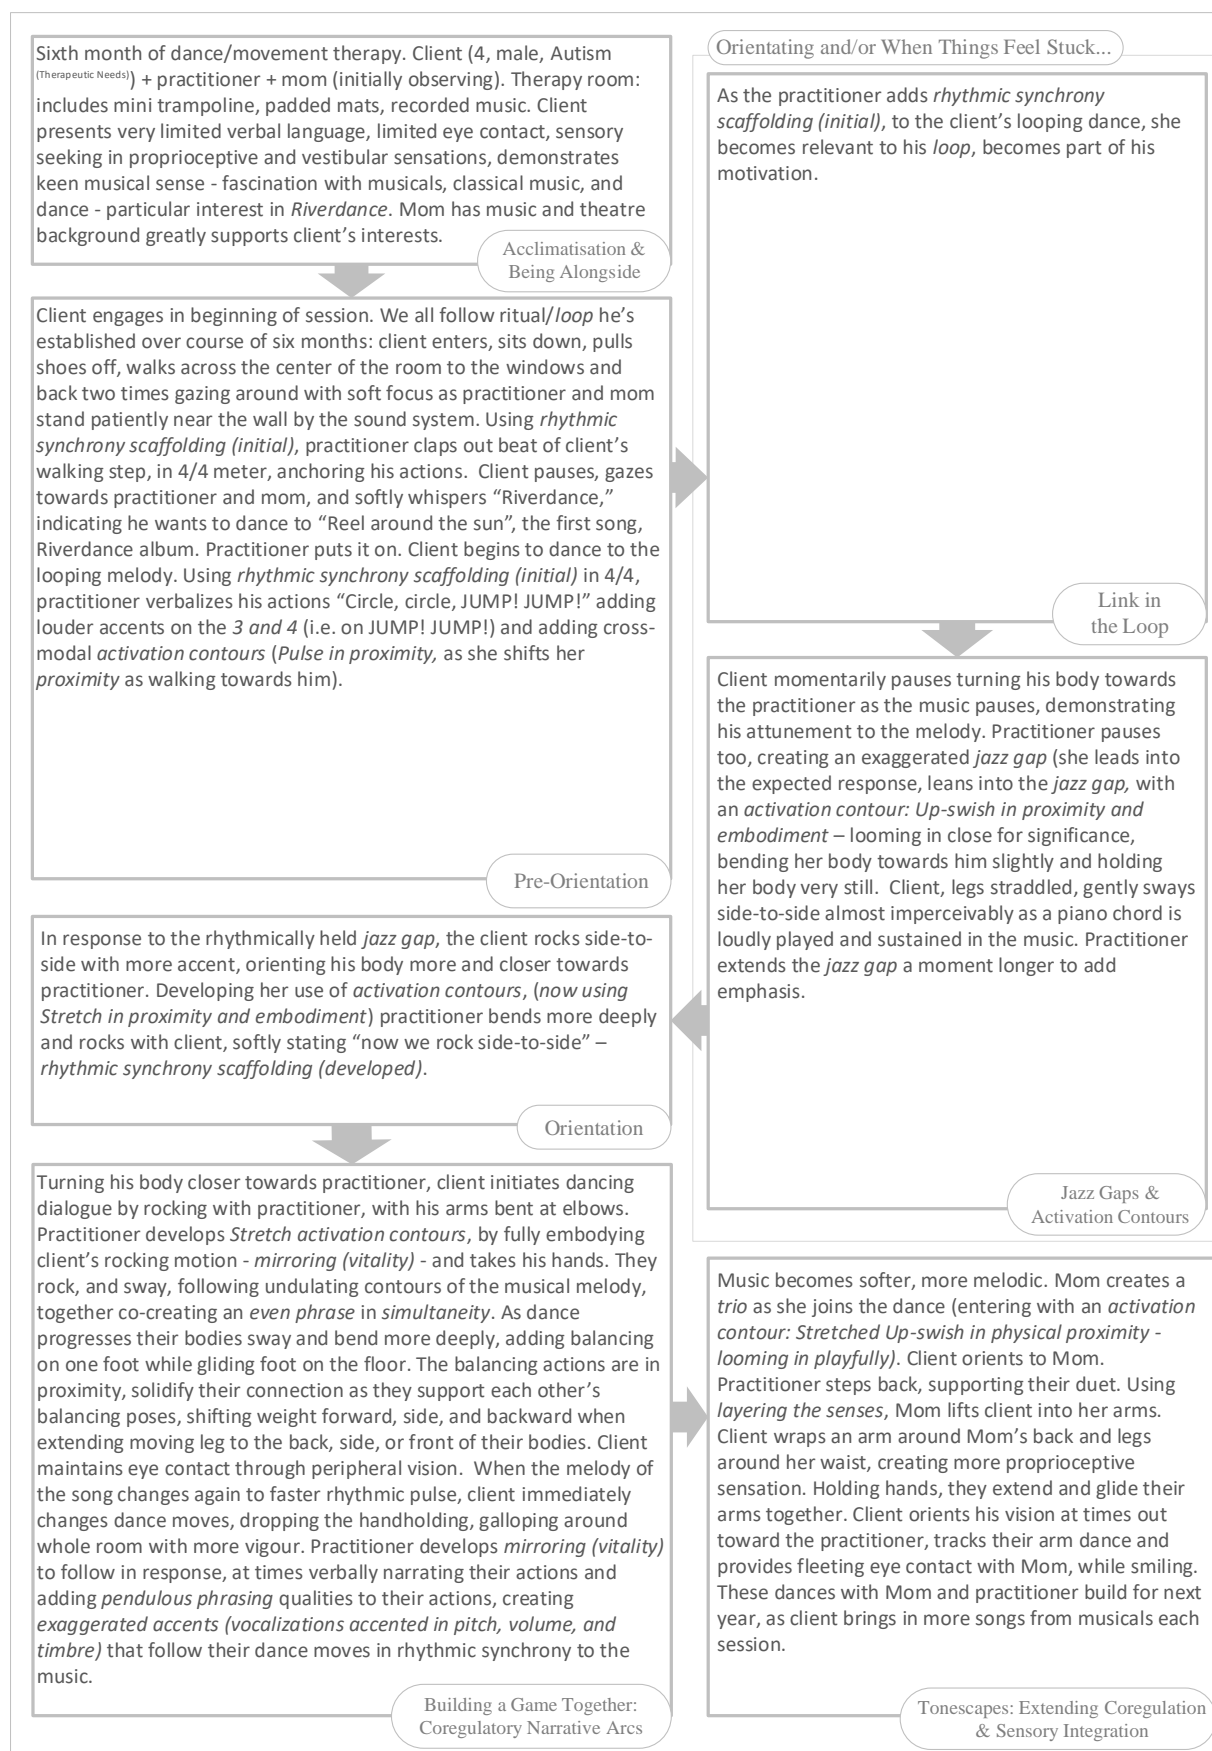

Supplementary Figure 7. Case Example. Rhythmic Relating within Dance Movement Therapy: Suzi Tortora.

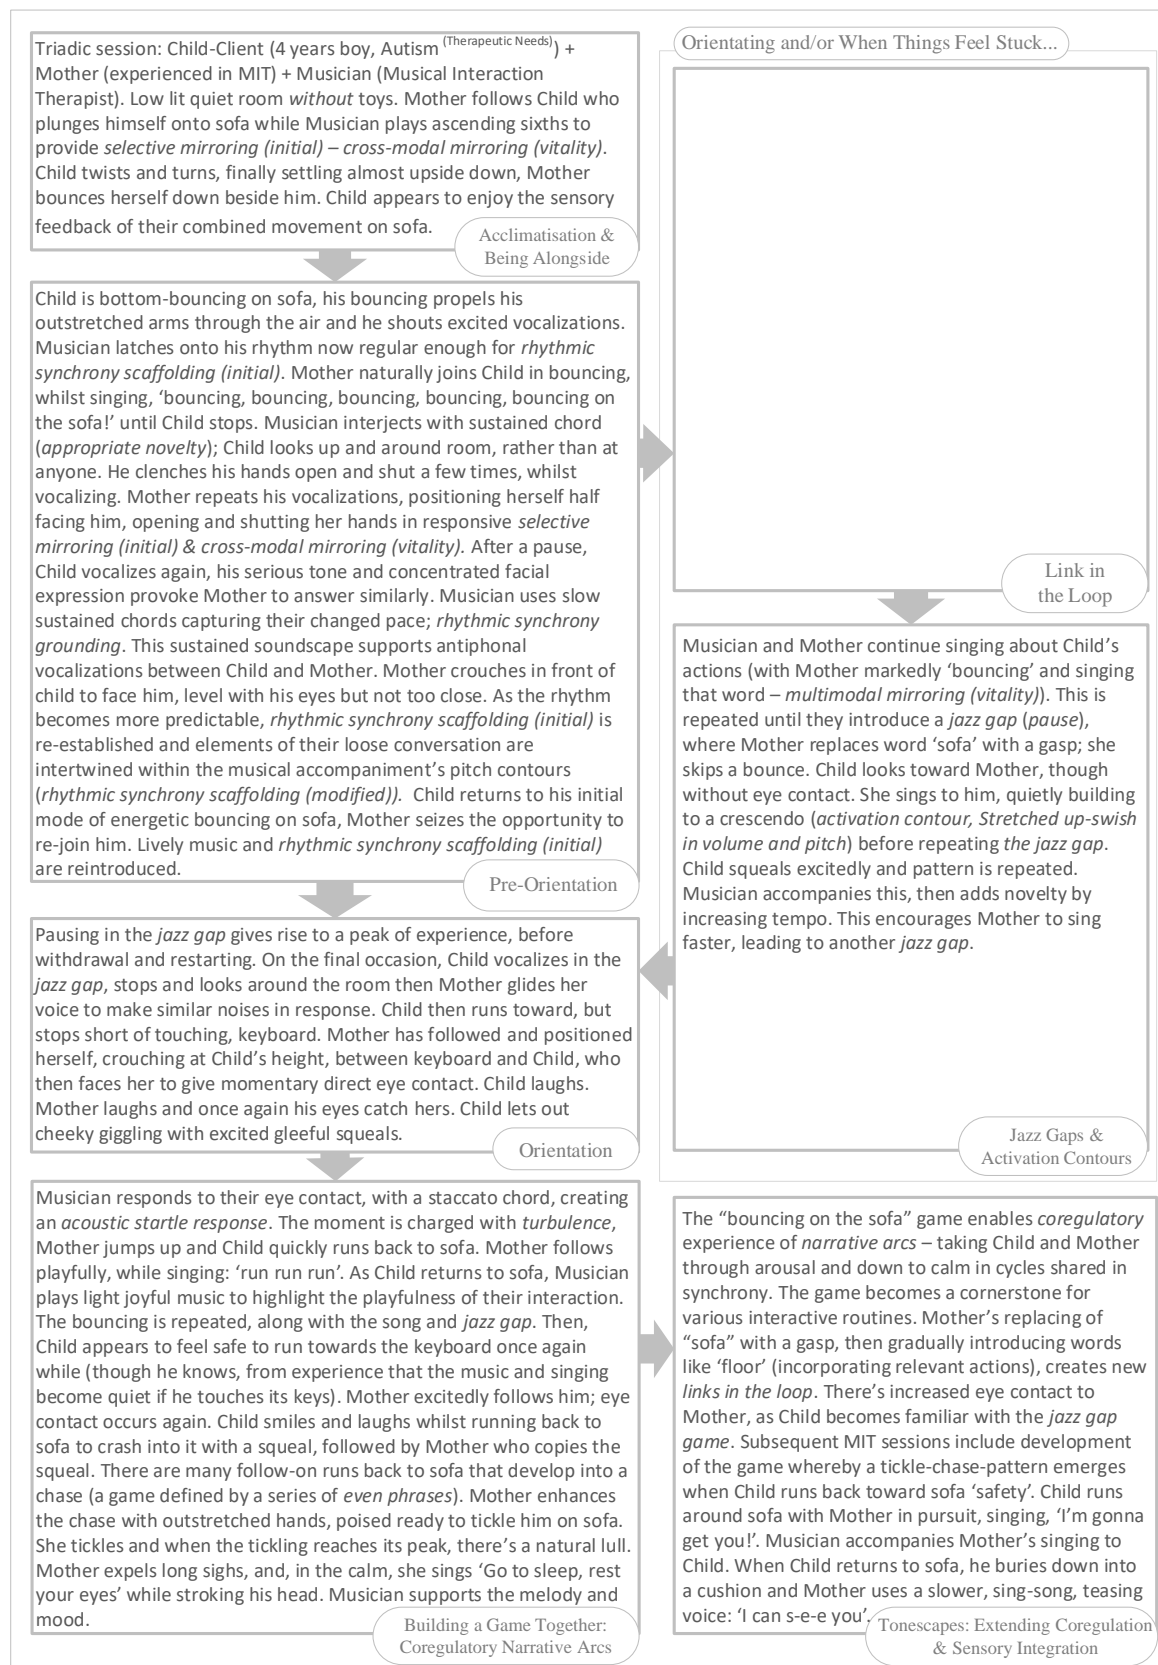

Supplementary Figure 8. Case Example. Rhythmic Relating within Musical Interaction Therapy (MIT): Judit Elias-Masiques, Marie-Claire Howorth, & Dawn Wimpory.

MIT involves triadic working: Musician and familiar adult (e.g., parent) support the interactions of a child-client with their familiar adult (the person best placed to facilitate enhanced communication from that child - within and beyond therapy). Musician’s role resembles live pianist’s accompaniment in early cinemas.



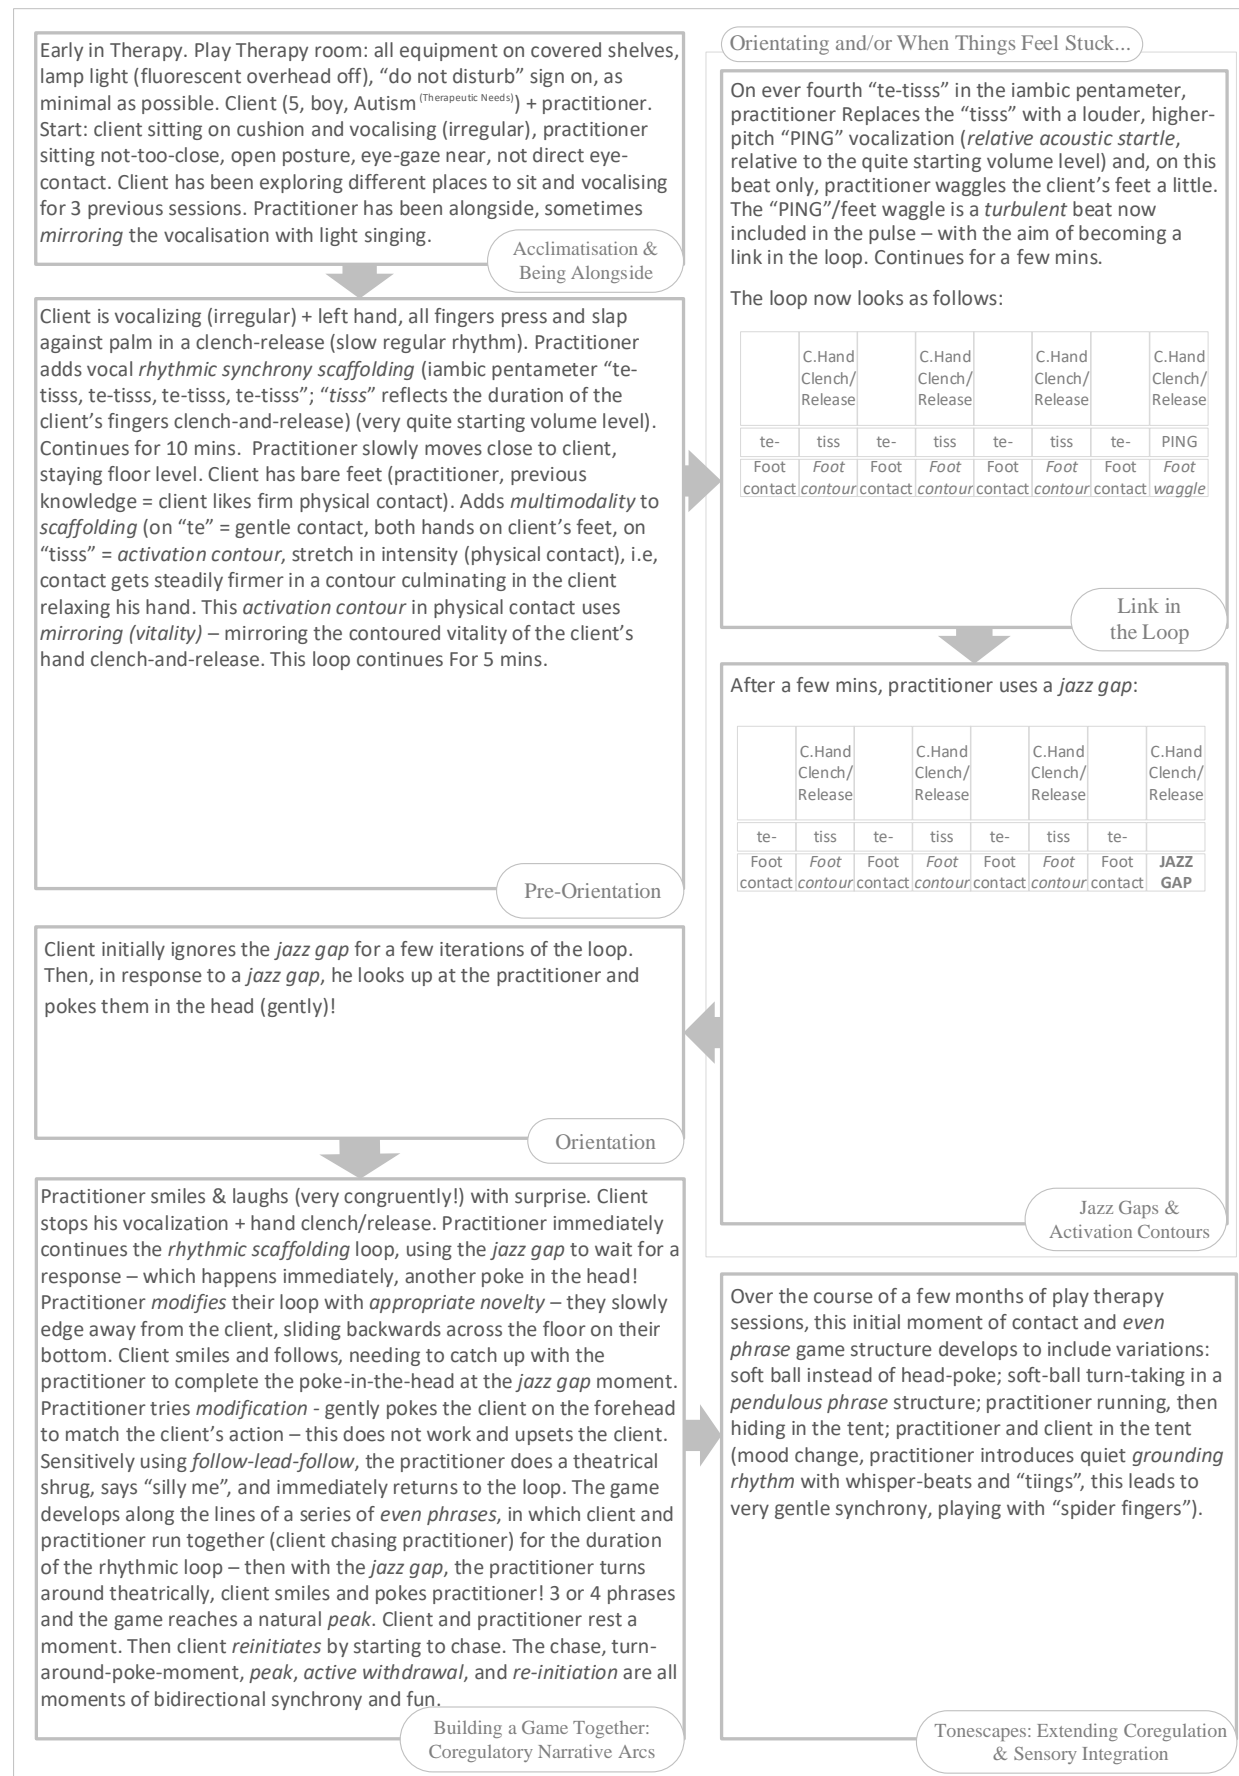

Supplementary Figure 9. Case Example. Rhythmic Relating within Play Therapy: Stuart Daniel.

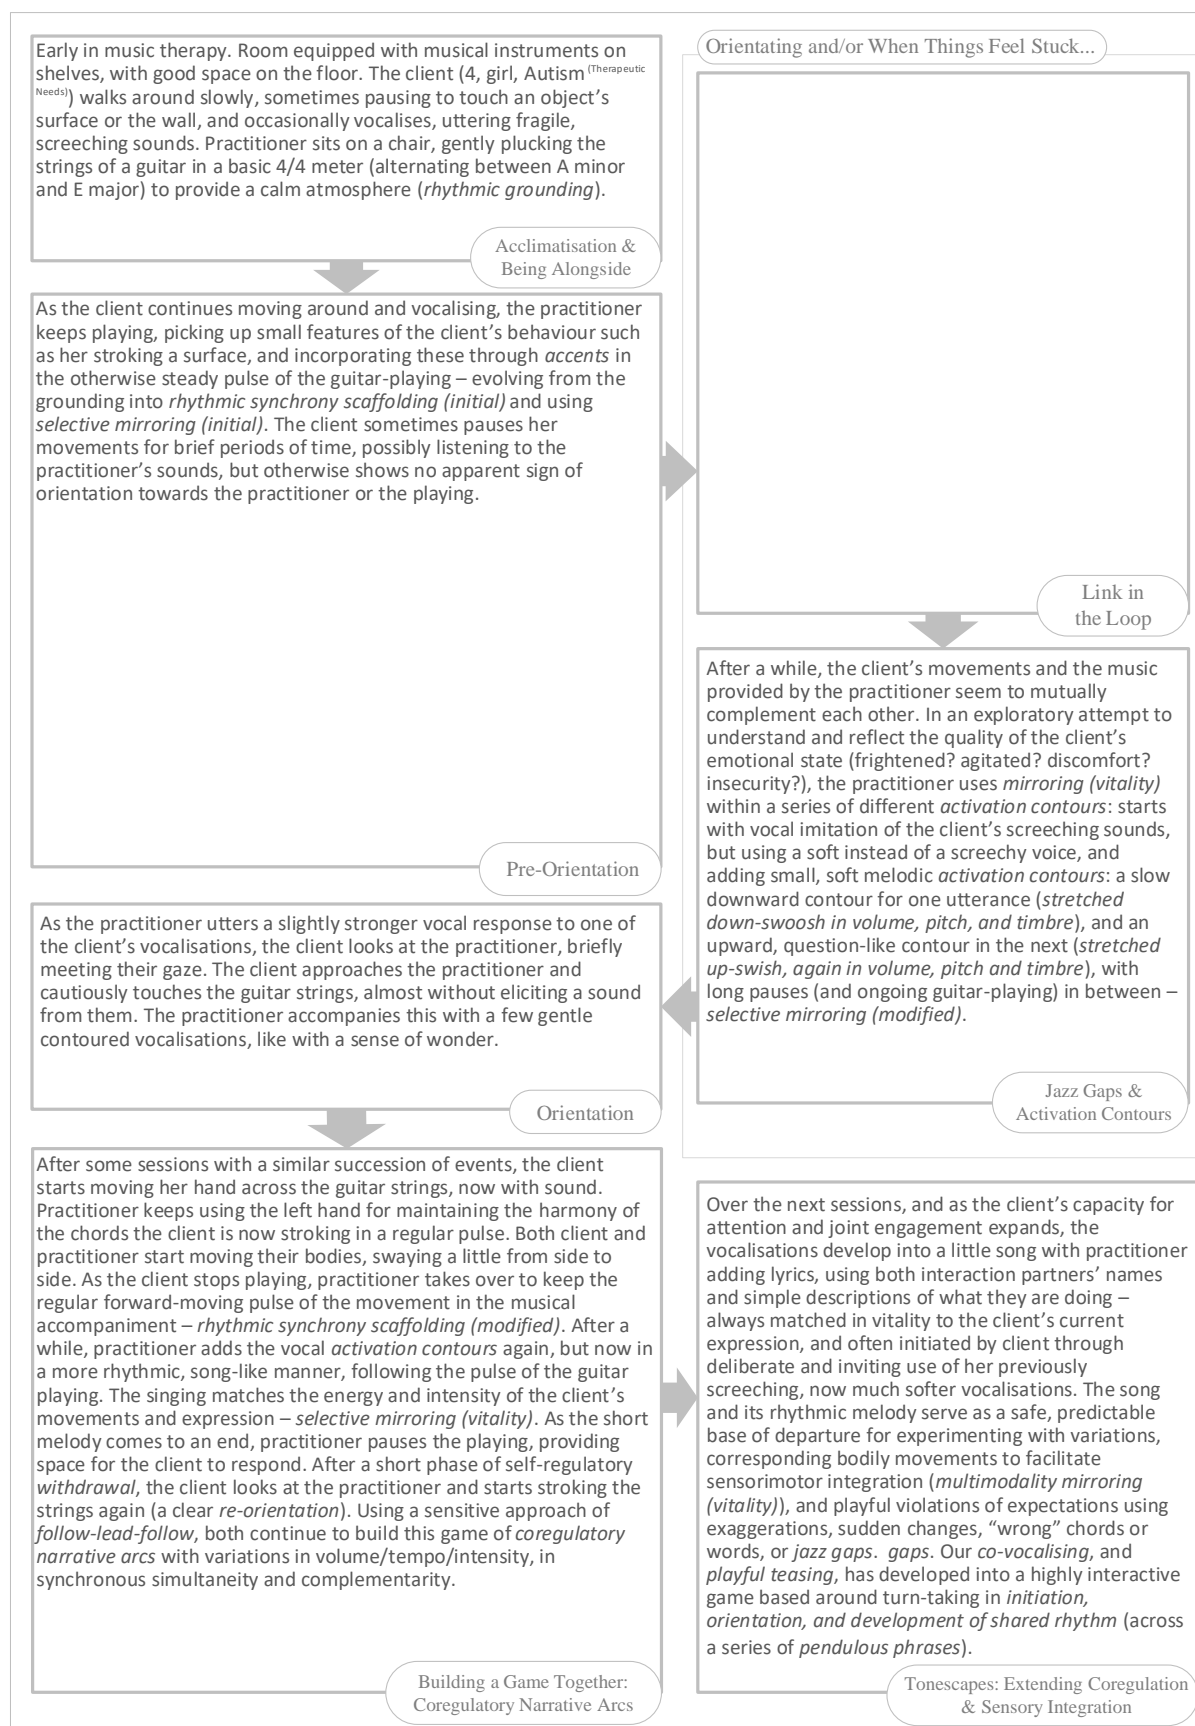

Supplementary Figure 10. Case Example. Rhythmic Relating within Improvisational Music Therapy: Monika Geretsegger & Ulla Holck.

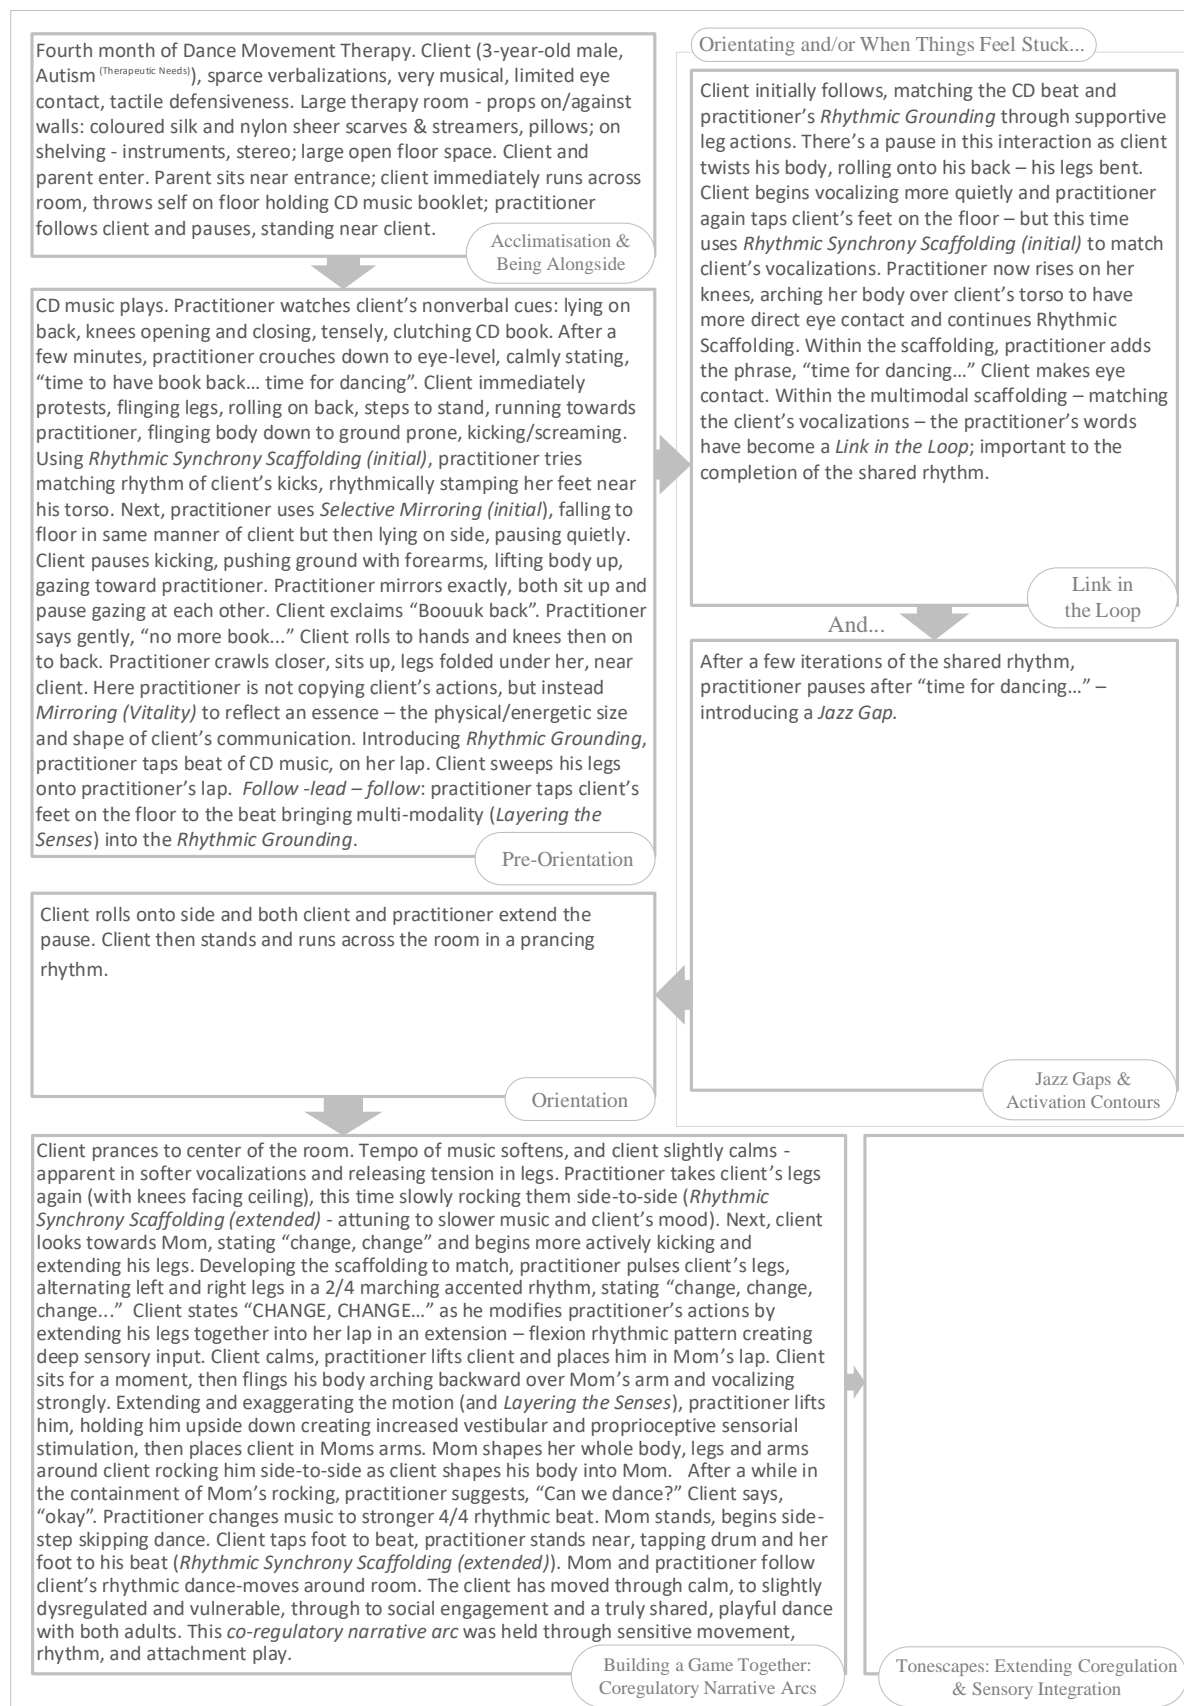

Supplementary Figure 11. Case Example. Rhythmic Relating within Dance Movement Therapy: Suzi Tortora.

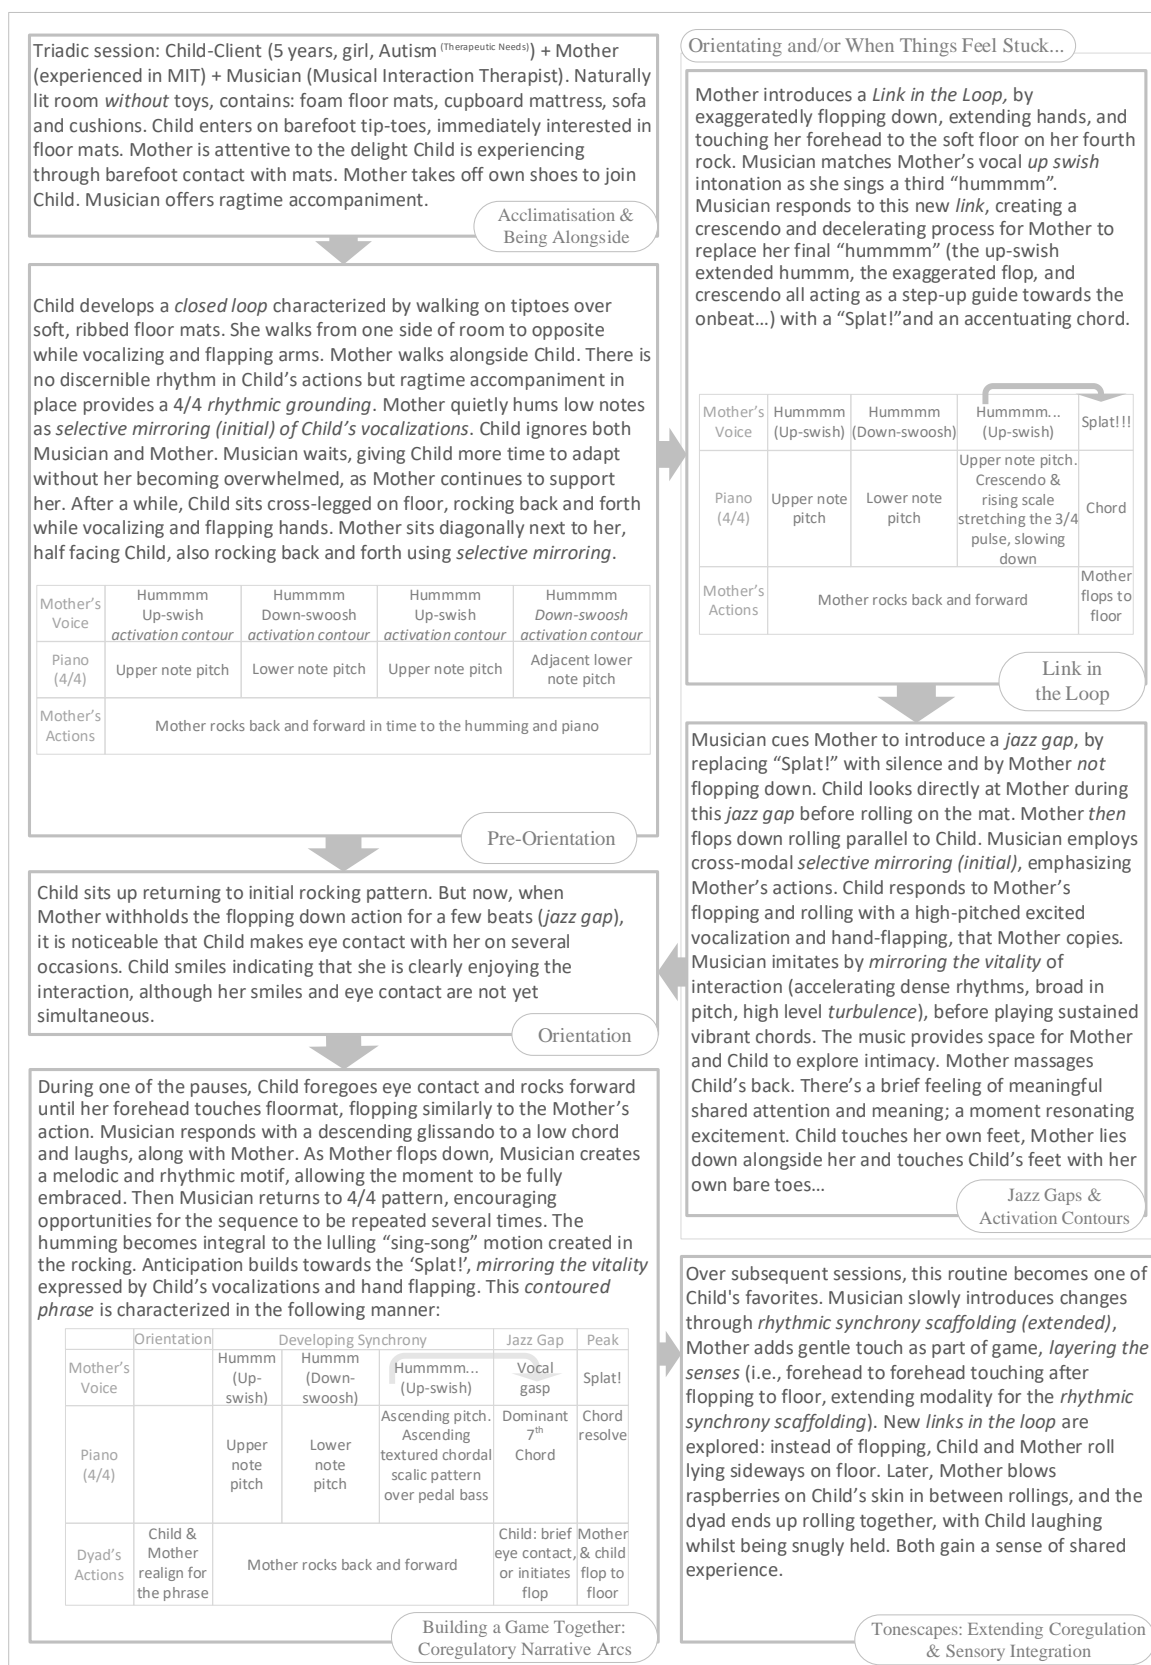

Supplementary Figure 12. Case Example. Rhythmic Relating within Musical Interaction Therapy (MIT): Judit Elias-Masiques, Marie-Claire Howorth, & Dawn Wimpory.

MIT involves triadic working: Musician and familiar adult (e.g., parent) support the interactions of a child-client with their familiar adult (the person best placed to facilitate enhanced communication from that child - within and beyond therapy). Musician's role resembles live pianist's accompaniment in early cinemas.

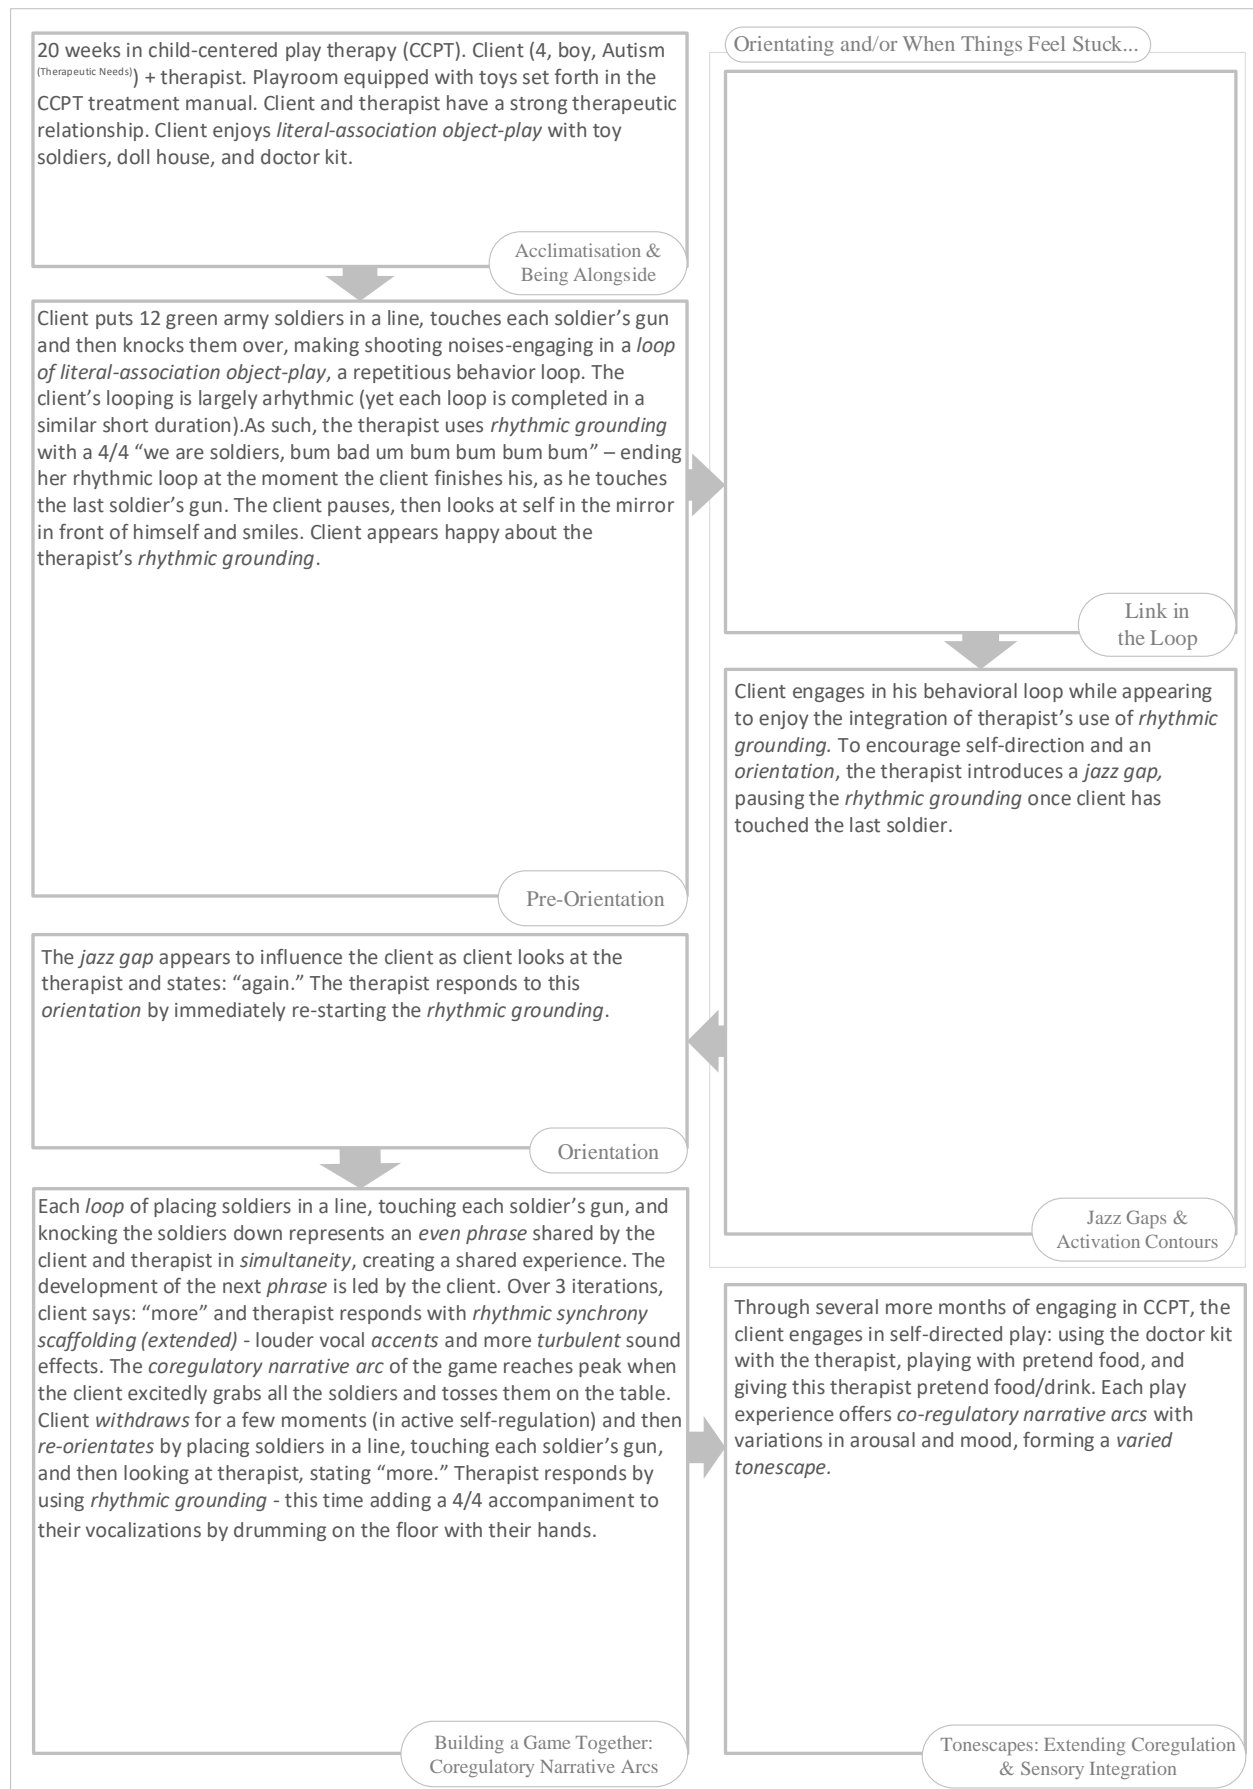

Supplementary Figure 13. Case Example. Rhythmic Relating within Play Therapy: Karrie Swan.
